# Supplementary material
Source: Research Square preprint supplement (doi:10.21203/rs.3.rs-8785827/v1)
Supplement: Supplementary file 1 [file 81f3ac924f7d81f734dccebb.pdf]

**Supplementary Table 1.** Quality control outcomes and putative compound identifications for all PTR-TOF-MS detected ions. Color coding indicates filtering outcomes: green = compounds retained for final analysis after quality control and successful database matching (n=48); purple = masses without confident match in GLOVOCS database ( $\pm 0.015$  Da window); dark gray = manually excluded ions comprising: compounds identified only in PTRwid Unified Mass List calculations, reagent/calibration ions and  $\text{H}_3\text{O}^+$  water clusters, inorganic gases and halogen-associated peaks, isotopes of major compounds (acetone, acetic acid, dimethyl sulfide); light gray = compounds failing automated quality criteria during preprocessing (detection threshold  $< 0.025$  ppbv, SNR  $< 0.1$ , or IQR ratio  $< 0.02$ ; see Methods). Putative chemical identities were assigned using GLOVOCS database matching with hierarchical classifications (class, superclass, subclass) provided where available.

| Identified $m/z+1$ <sup>1</sup> | Instrument ions <sup>2</sup> | Unwanted mass <sup>3</sup> | Unwanted isotopes <sup>4</sup> | Filtered out <sup>5</sup> | No match found | Matched mass <sup>6</sup> | Matched chemical formula <sup>7</sup> | Remarks                        |
|---------------------------------|------------------------------|----------------------------|--------------------------------|---------------------------|----------------|---------------------------|---------------------------------------|--------------------------------|
| 19.024                          | X                            |                            |                                |                           |                |                           |                                       | Water                          |
| 19.574                          |                              | X                          |                                |                           |                |                           |                                       |                                |
| 19.583                          |                              | X                          |                                |                           |                |                           |                                       |                                |
| 19.603                          |                              | X                          |                                |                           |                |                           |                                       |                                |
| 20.010                          |                              | X                          |                                |                           |                |                           |                                       |                                |
| 21.020                          | X                            |                            |                                |                           |                |                           |                                       | Primary ion isotope with O[18] |
| 22.669                          |                              | X                          |                                |                           |                |                           |                                       |                                |
| 22.731                          |                              | X                          |                                |                           |                |                           |                                       |                                |
| 22.745                          |                              | X                          |                                |                           |                |                           |                                       |                                |
| 22.771                          |                              | X                          |                                |                           |                |                           |                                       |                                |
| 26.013                          |                              | X                          |                                |                           |                |                           |                                       |                                |
| 28.008                          |                              | X                          |                                |                           |                |                           |                                       |                                |

|        |   |   |  |  |  |        |                                 |                      |
|--------|---|---|--|--|--|--------|---------------------------------|----------------------|
| 29.014 | X |   |  |  |  |        |                                 |                      |
| 29.996 | X |   |  |  |  |        |                                 |                      |
| 30.993 |   | X |  |  |  |        |                                 |                      |
| 31.999 | X |   |  |  |  |        |                                 |                      |
| 32.529 |   | X |  |  |  |        |                                 |                      |
| 32.590 |   | X |  |  |  |        |                                 |                      |
| 33.990 |   | X |  |  |  |        |                                 |                      |
| 36.015 |   | X |  |  |  |        |                                 |                      |
| 37.025 | X |   |  |  |  |        |                                 | Water cluster        |
| 37.932 |   | X |  |  |  |        |                                 |                      |
| 38.027 | X |   |  |  |  |        |                                 | Water cluster        |
| 39.026 | X |   |  |  |  |        |                                 | Water cluster        |
| 39.961 |   | X |  |  |  |        |                                 |                      |
| 40.971 |   | X |  |  |  |        |                                 |                      |
| 41.034 |   |   |  |  |  | 41.039 | C <sub>3</sub> H <sub>4</sub>   |                      |
| 42.022 |   |   |  |  |  | 42.034 | C <sub>2</sub> H <sub>3</sub> N |                      |
| 43.013 |   |   |  |  |  |        |                                 | Acetic acid fragment |
| 44.002 | X |   |  |  |  |        |                                 |                      |
| 44.994 | X |   |  |  |  |        |                                 |                      |
| 45.030 |   |   |  |  |  | 45.033 | C <sub>2</sub> H <sub>4</sub> O |                      |
| 45.988 | X |   |  |  |  |        |                                 |                      |
| 47.012 |   |   |  |  |  | 47.013 | CH <sub>2</sub> O <sub>2</sub>  |                      |
| 48.001 | X |   |  |  |  |        |                                 |                      |
| 49.005 |   |   |  |  |  | 49.011 | CH <sub>4</sub> S               |                      |
| 49.993 | X |   |  |  |  |        |                                 |                      |
| 51.008 |   | X |  |  |  |        |                                 |                      |
| 51.932 |   | X |  |  |  |        |                                 |                      |

|        |   |   |   |   |   |        |                                              |                                 |
|--------|---|---|---|---|---|--------|----------------------------------------------|---------------------------------|
| 51.996 |   | X |   |   |   |        |                                              |                                 |
| 52.932 |   |   |   | X |   |        |                                              |                                 |
| 53.003 |   | X |   |   |   |        |                                              |                                 |
| 53.930 |   |   |   | X |   |        |                                              |                                 |
| 55.034 | X |   |   |   |   |        |                                              | Water cluster                   |
| 55.927 |   | X |   |   |   |        |                                              |                                 |
| 56.045 |   |   |   |   |   | 56.049 | C <sub>3</sub> H <sub>5</sub> N              |                                 |
| 56.928 |   |   |   | X |   |        |                                              |                                 |
| 57.058 |   |   |   |   |   | 57.045 | C <sub>2</sub> H <sub>4</sub> N <sub>2</sub> |                                 |
| 57.929 |   | X |   |   |   |        |                                              |                                 |
| 58.042 |   |   |   |   |   | 58.041 | C <sub>3</sub> H <sub>5</sub> O              |                                 |
| 59.049 |   |   |   |   |   | 59.049 | C <sub>3</sub> H <sub>6</sub> O              |                                 |
| 59.950 |   |   |   |   | X |        |                                              |                                 |
| 60.049 |   |   | X |   |   |        |                                              | Isotope of 59.049 (Acetone)     |
| 61.031 |   |   |   |   |   | 61.028 | C <sub>2</sub> H <sub>4</sub> O <sub>2</sub> |                                 |
| 61.924 |   |   |   | X |   |        |                                              |                                 |
| 62.033 |   |   | X |   |   |        |                                              | Isotope of 61.031 (Acetic acid) |
| 63.027 |   |   |   |   |   | 63.026 | C <sub>2</sub> H <sub>6</sub> S              |                                 |
| 63.982 |   | X |   |   |   |        |                                              |                                 |
| 65.028 |   |   | X |   |   |        |                                              | Isotope of 63.027 (DMS)         |
| 66.025 |   |   |   | X |   |        |                                              |                                 |
| 66.981 |   |   |   | X |   |        |                                              |                                 |
| 67.060 |   |   |   | X |   |        |                                              |                                 |
| 67.962 |   |   |   | X |   |        |                                              |                                 |
| 68.056 |   |   |   | X |   |        |                                              |                                 |
| 69.073 |   |   |   |   |   | 69.070 | C <sub>5</sub> H <sub>8</sub>                |                                 |
| 70.069 |   |   |   | X |   |        |                                              |                                 |

|        |  |   |  |   |   |        |             |                       |
|--------|--|---|--|---|---|--------|-------------|-----------------------|
| 70.964 |  |   |  | X |   |        |             |                       |
| 71.059 |  |   |  |   |   | 71.060 | $C_3H_6N_2$ |                       |
| 71.951 |  |   |  | X |   |        |             |                       |
| 72.055 |  |   |  | X |   |        |             |                       |
| 72.955 |  |   |  |   | X |        |             |                       |
| 73.061 |  |   |  |   |   | 73.065 | $C_4H_8O$   |                       |
| 73.961 |  |   |  | X |   |        |             |                       |
| 74.041 |  |   |  |   |   | 74.035 | $CH_3N_3O$  |                       |
| 75.049 |  |   |  |   |   | 75.044 | $C_3H_6O_2$ |                       |
| 75.961 |  |   |  |   | X |        |             |                       |
| 76.044 |  |   |  | X |   |        |             |                       |
| 77.036 |  |   |  |   |   | 77.039 | $C_6H_4$    |                       |
| 77.959 |  |   |  | X |   |        |             |                       |
| 78.051 |  |   |  |   |   | 78.046 | $C_6H_5$    |                       |
| 79.058 |  |   |  |   |   | 79.054 | $C_6H_6$    |                       |
| 79.959 |  |   |  |   | X |        |             |                       |
| 80.057 |  |   |  |   |   | 80.049 | $C_5H_5N$   |                       |
| 81.071 |  |   |  |   |   |        |             | Monoterpenes fragment |
| 82.071 |  |   |  | X |   |        |             |                       |
| 82.988 |  |   |  | X |   |        |             |                       |
| 83.085 |  |   |  |   |   | 83.086 | $C_6H_{10}$ |                       |
| 83.954 |  |   |  | X |   |        |             |                       |
| 84.072 |  |   |  |   |   | 84.081 | $C_5H_9N$   |                       |
| 84.972 |  | X |  |   |   |        |             |                       |
| 85.056 |  |   |  |   |   | 85.065 | $C_5H_8O$   |                       |
| 85.969 |  |   |  | X |   |        |             |                       |
| 86.052 |  |   |  | X |   |        |             |                       |

|         |  |   |  |   |   |         |                                               |  |
|---------|--|---|--|---|---|---------|-----------------------------------------------|--|
| 87.061  |  |   |  | X |   |         |                                               |  |
| 87.952  |  |   |  | X |   |         |                                               |  |
| 88.057  |  |   |  | X |   |         |                                               |  |
| 88.970  |  |   |  |   | X |         |                                               |  |
| 89.052  |  |   |  |   |   | 89.060  | C <sub>4</sub> H <sub>8</sub> O <sub>2</sub>  |  |
| 89.963  |  |   |  |   | X |         |                                               |  |
| 90.961  |  | X |  |   |   |         |                                               |  |
| 91.961  |  |   |  |   | X |         |                                               |  |
| 92.061  |  |   |  | X |   |         |                                               |  |
| 93.059  |  |   |  |   |   | 93.057  | C <sub>6</sub> H <sub>6</sub> N               |  |
| 93.960  |  |   |  |   | X |         |                                               |  |
| 95.047  |  |   |  |   |   | 95.047  | C <sub>6</sub> H <sub>6</sub> O               |  |
| 95.955  |  |   |  |   | X |         |                                               |  |
| 97.008  |  |   |  |   |   | 97.011  | C <sub>5</sub> H <sub>4</sub> S               |  |
| 97.957  |  |   |  | X |   |         |                                               |  |
| 98.043  |  |   |  | X |   |         |                                               |  |
| 99.045  |  |   |  |   |   | 99.044  | C <sub>5</sub> H <sub>6</sub> O <sub>2</sub>  |  |
| 99.994  |  |   |  | X |   |         |                                               |  |
| 100.039 |  |   |  |   |   | 100.039 | C <sub>4</sub> H <sub>5</sub> NO <sub>2</sub> |  |
| 100.950 |  |   |  |   | X |         |                                               |  |
| 101.051 |  |   |  |   |   | 101.060 | C <sub>5</sub> H <sub>8</sub> O <sub>2</sub>  |  |
| 101.967 |  |   |  | X |   |         |                                               |  |
| 102.048 |  |   |  | X |   |         |                                               |  |
| 102.951 |  | X |  |   |   |         |                                               |  |
| 103.062 |  |   |  |   |   | 103.058 | C <sub>5</sub> H <sub>10</sub> S              |  |
| 103.962 |  |   |  |   | X |         |                                               |  |
| 104.049 |  |   |  |   |   | 104.049 | C <sub>7</sub> H <sub>5</sub> N               |  |

|         |   |   |  |   |   |         |                |                              |
|---------|---|---|--|---|---|---------|----------------|------------------------------|
| 104.958 |   |   |  | X |   |         |                |                              |
| 105.062 |   |   |  |   |   | 105.055 | $C_4H_8O_3$    |                              |
| 105.955 |   |   |  |   | X |         |                |                              |
| 106.966 |   |   |  |   | X |         |                |                              |
| 107.076 |   |   |  |   |   | 107.070 | $C_4H_{10}O_3$ |                              |
| 107.970 |   |   |  |   | X |         |                |                              |
| 108.960 |   | X |  |   |   |         |                |                              |
| 109.960 |   |   |  |   | X |         |                |                              |
| 110.965 |   |   |  |   | X |         |                |                              |
| 111.087 |   |   |  |   |   | 111.092 | $C_6H_{10}N_2$ |                              |
| 111.966 |   |   |  | X |   |         |                |                              |
| 112.063 |   |   |  | X |   |         |                |                              |
| 113.049 |   |   |  |   |   | 113.042 | $C_6H_8S$      |                              |
| 114.038 |   | X |  |   |   |         |                |                              |
| 115.067 |   |   |  |   |   | 115.075 | $C_6H_{10}O_2$ |                              |
| 116.060 |   |   |  | X |   |         |                |                              |
| 116.909 |   |   |  |   | X |         |                |                              |
| 117.077 |   |   |  |   |   | 117.073 | $C_6H_{12}S$   |                              |
| 117.953 |   |   |  | X |   |         |                |                              |
| 118.911 |   | X |  |   |   |         |                |                              |
| 119.953 |   |   |  |   | X |         |                |                              |
| 120.932 |   | X |  |   |   |         |                |                              |
| 121.087 |   |   |  |   |   | 121.086 | $C_5H_{12}O_3$ |                              |
| 121.959 |   |   |  |   | X |         |                |                              |
| 122.959 |   |   |  | X |   |         |                |                              |
| 123.082 |   |   |  |   |   | 123.092 | $C_8H_{10}O$   |                              |
| 123.946 | X |   |  |   |   |         |                | Impurities from Teflon rings |

|         |  |   |  |   |   |         |                                               |  |
|---------|--|---|--|---|---|---------|-----------------------------------------------|--|
| 124.953 |  | X |  |   |   |         |                                               |  |
| 125.094 |  |   |  |   |   | 125.094 | C <sub>8</sub> H <sub>12</sub> O              |  |
| 125.959 |  | X |  |   |   |         |                                               |  |
| 126.968 |  |   |  |   |   | 126.970 | C <sub>2</sub> H <sub>6</sub> S <sub>3</sub>  |  |
| 127.951 |  |   |  |   | X |         |                                               |  |
| 128.949 |  |   |  | X |   |         |                                               |  |
| 129.095 |  |   |  |   |   | 129.091 | C <sub>7</sub> H <sub>12</sub> O <sub>2</sub> |  |
| 129.947 |  |   |  | X |   |         |                                               |  |
| 130.066 |  |   |  | X |   |         |                                               |  |
| 130.985 |  |   |  | X |   |         |                                               |  |
| 131.056 |  |   |  | X |   |         |                                               |  |
| 131.914 |  |   |  | X |   |         |                                               |  |
| 132.017 |  |   |  | X |   |         |                                               |  |
| 133.065 |  |   |  | X |   |         |                                               |  |
| 133.921 |  |   |  | X |   |         |                                               |  |
| 135.008 |  |   |  | X |   |         |                                               |  |
| 135.093 |  |   |  | X |   |         |                                               |  |
| 135.953 |  |   |  | X |   |         |                                               |  |
| 136.035 |  |   |  | X |   |         |                                               |  |
| 136.959 |  |   |  | X |   |         |                                               |  |
| 137.126 |  |   |  |   |   | 137.132 | C <sub>10</sub> H <sub>16</sub>               |  |
| 137.962 |  |   |  | X |   |         |                                               |  |
| 138.121 |  |   |  | X |   |         |                                               |  |
| 139.031 |  |   |  | X |   |         |                                               |  |
| 139.097 |  |   |  |   |   | 139.112 | C <sub>9</sub> H <sub>14</sub> O              |  |
| 139.978 |  |   |  | X |   |         |                                               |  |
| 140.015 |  |   |  | X |   |         |                                               |  |

|         |  |  |  |   |         |                |  |
|---------|--|--|--|---|---------|----------------|--|
| 140.089 |  |  |  | X |         |                |  |
| 141.092 |  |  |  |   | 141.091 | $C_8H_{12}O_2$ |  |
| 141.953 |  |  |  | X |         |                |  |
| 142.926 |  |  |  | X |         |                |  |
| 143.124 |  |  |  | X |         |                |  |
| 143.925 |  |  |  | X |         |                |  |
| 144.917 |  |  |  | X |         |                |  |
| 145.090 |  |  |  | X |         |                |  |
| 146.996 |  |  |  | X |         |                |  |
| 147.049 |  |  |  | X |         |                |  |
| 148.030 |  |  |  | X |         |                |  |
| 149.048 |  |  |  | X |         |                |  |
| 150.053 |  |  |  | X |         |                |  |
| 151.102 |  |  |  | X |         |                |  |
| 152.110 |  |  |  | X |         |                |  |
| 153.097 |  |  |  |   | 153.091 | $C_9H_{12}O_2$ |  |
| 154.089 |  |  |  | X |         |                |  |
| 155.094 |  |  |  | X |         |                |  |
| 156.073 |  |  |  | X |         |                |  |
| 157.069 |  |  |  |   | 157.065 | $C_{11}H_8O$   |  |
| 158.037 |  |  |  | X |         |                |  |
| 159.039 |  |  |  | X |         |                |  |
| 159.091 |  |  |  | X |         |                |  |
| 160.982 |  |  |  | X |         |                |  |
| 161.069 |  |  |  | X |         |                |  |
| 161.928 |  |  |  | X |         |                |  |
| 162.961 |  |  |  | X |         |                |  |

|         |   |  |  |   |  |  |  |  |
|---------|---|--|--|---|--|--|--|--|
| 164.025 |   |  |  | X |  |  |  |  |
| 165.004 |   |  |  | X |  |  |  |  |
| 167.087 |   |  |  | X |  |  |  |  |
| 169.089 |   |  |  | X |  |  |  |  |
| 171.107 |   |  |  | X |  |  |  |  |
| 173.039 |   |  |  | X |  |  |  |  |
| 174.053 |   |  |  | X |  |  |  |  |
| 175.035 |   |  |  | X |  |  |  |  |
| 177.032 |   |  |  | X |  |  |  |  |
| 178.953 |   |  |  | X |  |  |  |  |
| 180.936 |   |  |  | X |  |  |  |  |
| 182.020 |   |  |  | X |  |  |  |  |
| 183.098 |   |  |  | X |  |  |  |  |
| 185.012 |   |  |  | X |  |  |  |  |
| 185.128 |   |  |  | X |  |  |  |  |
| 187.049 |   |  |  | X |  |  |  |  |
| 189.016 |   |  |  | X |  |  |  |  |
| 189.969 |   |  |  | X |  |  |  |  |
| 191.019 |   |  |  | X |  |  |  |  |
| 192.032 |   |  |  | X |  |  |  |  |
| 193.041 |   |  |  | X |  |  |  |  |
| 195.015 |   |  |  | X |  |  |  |  |
| 196.170 |   |  |  | X |  |  |  |  |
| 198.194 |   |  |  | X |  |  |  |  |
| 199.183 |   |  |  | X |  |  |  |  |
| 202.978 |   |  |  | X |  |  |  |  |
| 203.939 | X |  |  |   |  |  |  |  |

|         |   |  |   |   |  |  |  |
|---------|---|--|---|---|--|--|--|
| 204.942 | X |  |   |   |  |  |  |
| 205.998 |   |  |   | X |  |  |  |
| 207.033 |   |  | X |   |  |  |  |
| 209.021 |   |  | X |   |  |  |  |
| 212.998 |   |  | X |   |  |  |  |
| 219.935 |   |  | X |   |  |  |  |
| 220.933 |   |  |   | X |  |  |  |
| 221.937 |   |  | X |   |  |  |  |
| 223.056 |   |  | X |   |  |  |  |
| 224.064 |   |  | X |   |  |  |  |
| 225.030 |   |  | X |   |  |  |  |
| 226.022 |   |  | X |   |  |  |  |
| 227.018 |   |  | X |   |  |  |  |
| 230.931 |   |  | X |   |  |  |  |
| 233.909 |   |  | X |   |  |  |  |
| 234.913 |   |  | X |   |  |  |  |

<sup>1</sup>Identified in PTRwid Unified Mass List calculations (see Methods).

<sup>2</sup>Including reagent ions and internal calibration gases as well as primary ion water clusters.

<sup>3</sup>Including inorganic gases, and peaks associated with halogens.

<sup>4</sup>Isotopes of abundant compounds (i.e., Acetone, Acetic acid, and DMS).

<sup>5</sup>Not excluded manually like the first four groups but filtered out in the preprocessing (see Methods).

<sup>6</sup>Matched masses in the GLOVOCs database.

<sup>7</sup>Chemical formula of the matched masses in the GLOVOCs database.
